# Supplementary material for: Superolateral medial forebrain bundle deep brain stimulation in major depression: a gateway trial
Source: PubMed Central journal article supplement (PMC6785007; doi:10.1038/s41386-019-0369-9), 2019-03-13

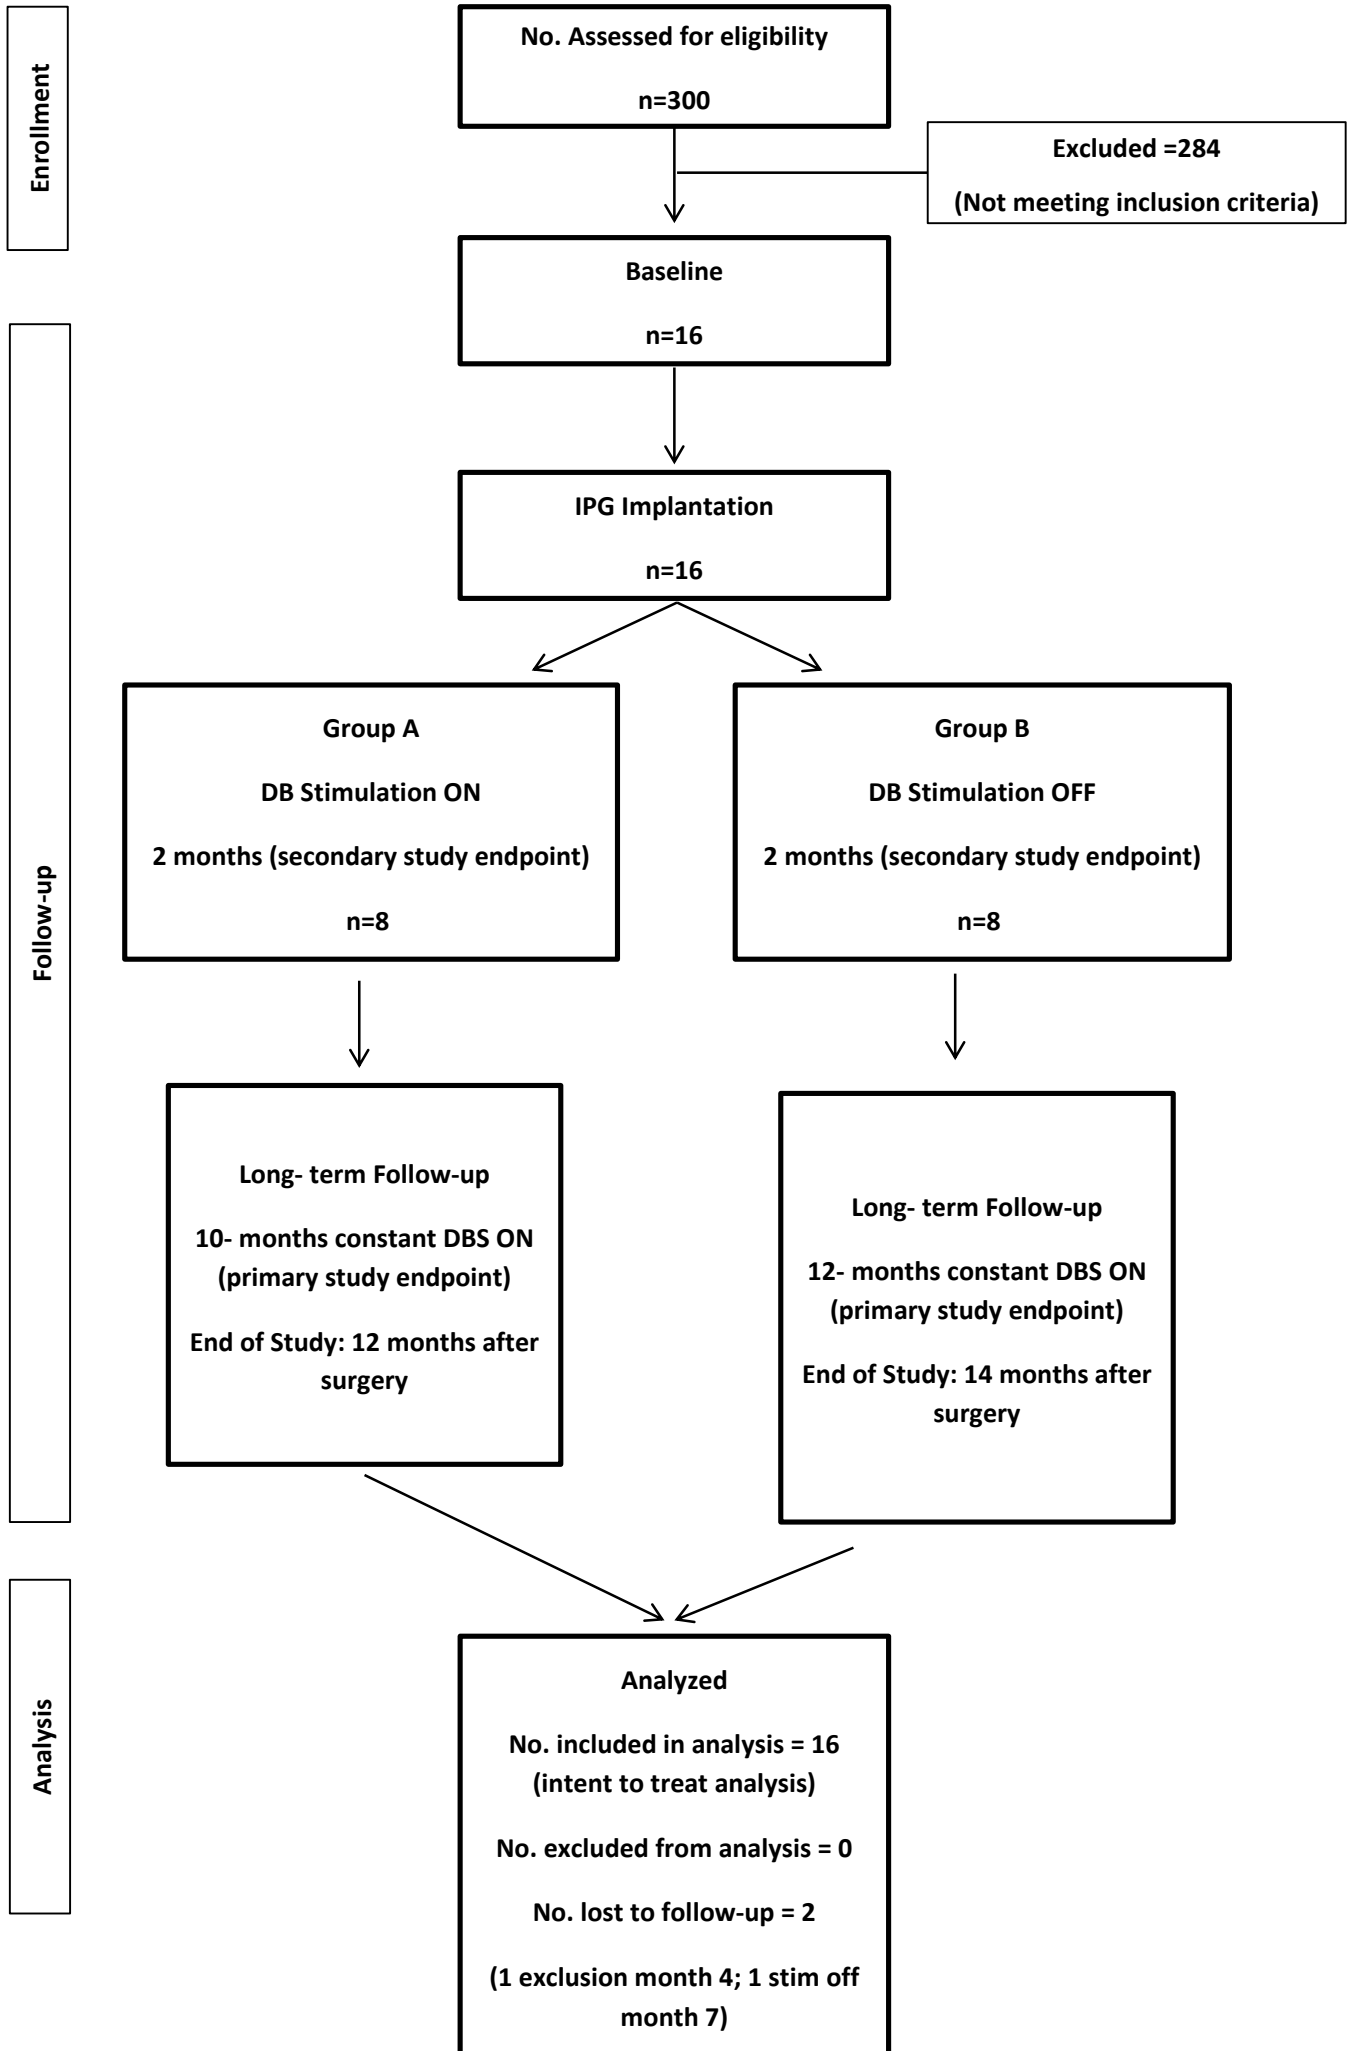

Supplement: 41386_2019_369_MOESM2_ESM.pdf [file 41386_2019_369_MOESM2_ESM.pdf]
