# Supplementary material for: Superolateral medial forebrain bundle deep brain stimulation in major depression: a gateway trial
Source: PubMed Central journal article supplement (PMC6785007; doi:10.1038/s41386-019-0369-9), 2019-03-13
Supplement: 41386_2019_369_MOESM5_ESM.pdf [file 41386_2019_369_MOESM5_ESM.pdf]

**eTable 3: Clinical Measures for sham and active DB stimulation**

|         |         | Group A - active |        | Group B - sham |        | GLMM Statistics    |                    | t value | p-value |
|---------|---------|------------------|--------|----------------|--------|--------------------|--------------------|---------|---------|
|         |         | Mean reduction   | SD     | Mean reduction | SD     | Factor             |                    |         |         |
| MADRS   | Week 2  | -18.38           | 5.48   | -17.50         | 4.24   | GROUP (on vs. off) | 0.50               | 0.61    |         |
|         | Week 3  | -17.50           | 8.67   | -14.88         | 8.35   | TIME (week 1-8)    | 4.37               | <0.001  |         |
|         | Week 4  | -18.50           | 7.63   | -13.86         | 6.57   | GROUPxTIME         | -2.82              | 0.006   |         |
|         | Week 5  | -14.50           | 8.78   | -11.25         | 7.32   |                    |                    |         |         |
|         | Week 6  | -16.38           | 8.98   | -9.88          | 6.38   |                    |                    |         |         |
|         | Week 7  | -18.57           | 11.24  | -6.86          | 6.64   |                    |                    |         |         |
|         | Week 8  | -17.14           | 10.09  | -8.14          | 9.12   |                    |                    |         |         |
|         | HDRS    | Week 2           | -16.50 | 6.32           | -16.75 | 3.06               | GROUP (on vs. off) | 0.72    | 0.47    |
| Week 3  |         | -15.63           | 8.98   | -14.88         | 6.29   | TIME (week 1-8)    | 3.27               | 0.002   |         |
| Week 4  |         | -17.13           | 9.91   | -15.00         | 7.44   | GROUPxTIME         | -2.23              | 0.03    |         |
| Week 5  |         | -13.00           | 7.37   | -11.13         | 7.51   |                    |                    |         |         |
| Week 6  |         | -13.88           | 8.84   | -11.13         | 6.42   |                    |                    |         |         |
| Week 7  |         | -15.86           | 9.70   | -9.57          | 8.89   |                    |                    |         |         |
| Week 8  |         | -16.43           | 9.41   | -10.43         | 11.12  |                    |                    |         |         |
| SF-36ph |         | Week 2           | 0.33   | 13.11          | 0.13   | 7.88               | GROUP (on vs. off) | -0.18   | 0.86    |
|         | Week 3  | -2.33            | 5.99   | -1.12          | 7.94   | TIME (week 1-8)    | -0.39              | 0.69    |         |
|         | Week 4  | -2.00            | 8.72   | -4.43          | 9.86   | GROUPxTIME         | 0.48               | 0.63    |         |
|         | Week 5  | -1.75            | 6.39   | -3.71          | 7.57   |                    |                    |         |         |
|         | Week 6  | -0.86            | 8.05   | -1.71          | 8.98   |                    |                    |         |         |
|         | Week 7  | -1.00            | 6.63   | -1.14          | 11.03  |                    |                    |         |         |
|         | Week 8  | -3.29            | 4.75   | 0.57           | 8.99   |                    |                    |         |         |
|         | SF-36mh | Week 2           | 6.83   | 5.78           | 9.13   | 7.51               | GROUP (on vs. off) | -0.36   | 0.72    |
| Week 3  |         | 9.00             | 7.18   | 7.50           | 5.83   | TIME (week 1-8)    | 0.31               | 0.76    |         |
| Week 4  |         | 9.29             | 8.46   | 8.43           | 3.82   | GROUPxTIME         | -0.15              | 0.88    |         |
| Week 5  |         | 5.38             | 8.09   | 9.29           | 7.23   |                    |                    |         |         |
| Week 6  |         | 6.86             | 11.91  | 11.57          | 7.98   |                    |                    |         |         |
| Week 7  |         | 8.29             | 9.69   | 9.86           | 10.29  |                    |                    |         |         |
| Week 8  |         | 8.43             | 11.54  | 6.86           | 11.23  |                    |                    |         |         |
| GAF     |         | Week 2           | 14.88  | 8.48           | 17.00  | 12.05              | GROUP (on vs. off) | -0.83   | 0.41    |
|         | Week 3  | 17.38            | 10.18  | 24.38          | 16.85  | TIME (week 1-8)    | -1.44              | 0.15    |         |
|         | Week 4  | 21.13            | 12.48  | 16.57          | 9.80   | GROUPxTIME         | 1.07               | 0.29    |         |
|         | Week 5  | 14.75            | 8.96   | 19.13          | 11.96  |                    |                    |         |         |
|         | Week 6  | 19.88            | 8.01   | 17.50          | 14.89  |                    |                    |         |         |
|         | Week 7  | 16.86            | 11.14  | 16.43          | 15.26  |                    |                    |         |         |
|         | Week 8  | 14.71            | 11.99  | 15.57          | 17.25  |                    |                    |         |         |
|         | BDI     | Week 2           | -16.00 | 13.03          | -12.12 | 8.74               | GROUP (on vs. off) | 0.31    | 0.75    |
| Week 3  |         | -12.83           | 9.68   | -12.12         | 8.21   | TIME (week 1-8)    | 0.09               | 0.93    |         |
| Week 4  |         | -6.57            | 12.79  | -12.28         | 6.72   | GROUPxTIME         | 0.34               | 0.74    |         |
| Week 5  |         | -7.37            | 8.79   | -13.50         | 7.23   |                    |                    |         |         |
| Week 6  |         | -8.00            | 12.32  | -14.25         | 6.06   |                    |                    |         |         |
| Week 7  |         | -13.42           | 12.42  | -13.00         | 9.83   |                    |                    |         |         |
| Week 8  |         | -12.57           | 9.44   | -12.00         | 9.38   |                    |                    |         |         |
| IDSSR   |         | Week 2           | -17.66 | 13.45          | -16.00 | 12.23              | GROUP (on vs. off) | 0.94    | 0.34    |
|         | Week 3  | -15.16           | 9.98   | -16.62         | 14.21  | TIME (week 1-8)    | 1.3                | 0.19    |         |
|         | Week 4  | -8.42            | 10.53  | -15.28         | 15.85  | GROUPxTIME         | -0.89              | 0.37    |         |
|         | Week 5  | -9.50            | 9.30   | -16.12         | 15.15  |                    |                    |         |         |
|         | Week 6  | -10.87           | 14.57  | -16.37         | 14.04  |                    |                    |         |         |
|         | Week 7  | -16.85           | 11.79  | -14.57         | 16.37  |                    |                    |         |         |
|         | Week 8  | -16.57           | 13.15  | -12.57         | 13.80  |                    |                    |         |         |
|         | SLC-90  | Week 2           | -10.33 | 11.36          | -16.85 | 8.37               | GROUP (on vs. off) | 1.15    | 0.25    |
| Week 3  |         | -9.66            | 9.45   | -13.75         | 11.74  | TIME (week 1-8)    | 1.96               | 0.054   |         |
| Week 4  |         | -2.80            | 10.68  | -12.00         | 9.50   | GROUPxTIME         | 0.58               | 0.56    |         |
| Week 5  |         | -4.71            | 8.67   | -15.87         | 9.62   |                    |                    |         |         |
| Week 6  |         | -6.85            | 9.88   | -13.25         | 10.95  |                    |                    |         |         |
| Week 7  |         | -5.60            | 7.60   | -11.42         | 11.78  |                    |                    |         |         |
| Week 8  |         | -7.16            | 7.88   | -10.57         | 10.79  |                    |                    |         |         |

Note. Clinical measures are analyzed with a MIXED Model between sham and active DBS groups from week 2 to week 8.
